# Supplementary material
Source: publisher site journal article supplement (https://www.spandidos-publications.com/394/downloadSupplementary)

Figure S1. Heatmap was of the top 50 genes of DD vs. WD liposarcoma in each set of tumors. (A) Data set from GSE30929; (B) data set from the study of Singer *et al* (13). Red, upregulation; blue, downregulation. DD, dedifferentiated; WD, well-differentiated.

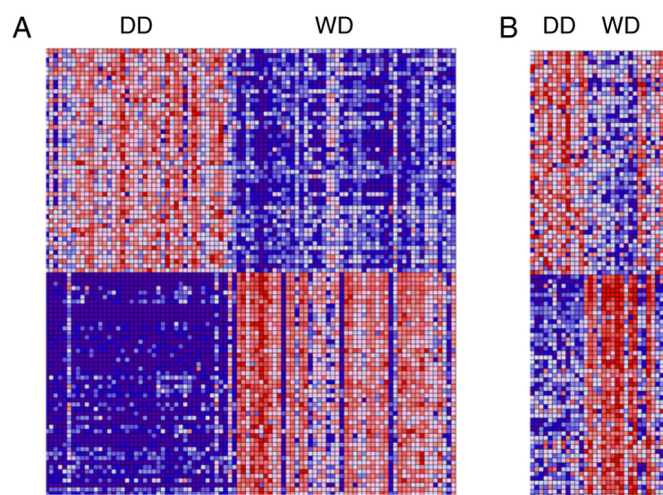

Figure S2. Representative flow cytometry plots of cell cycle analysis, assessed by PI staining and flow cytometry, of (A) LPS853 cells and (B) NDDL5-1 cells after being treated with MLN8237 at various concentration. PI, propidium iodide.

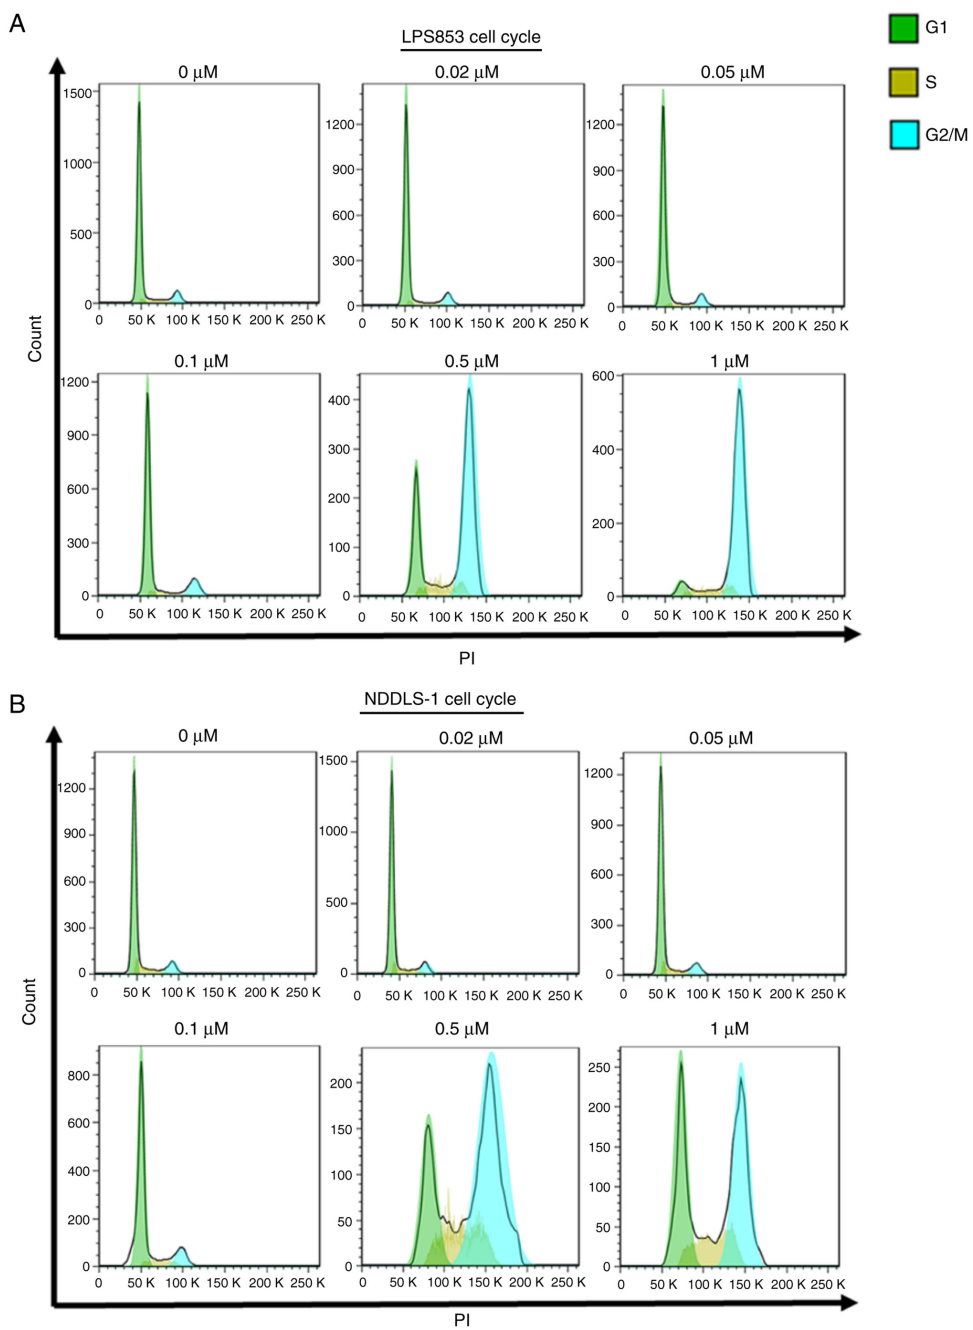

Figure S3. Representative scatterplots of the percentage of apoptosis. The apoptosis of cells was assessed by Annexin V-fluorescein isothiocyanate/PI staining and flow cytometry of (A) LPS853 and (B) NDDL5-1 after treatment with MLN8237 at various concentrations. PI, propidium iodide.

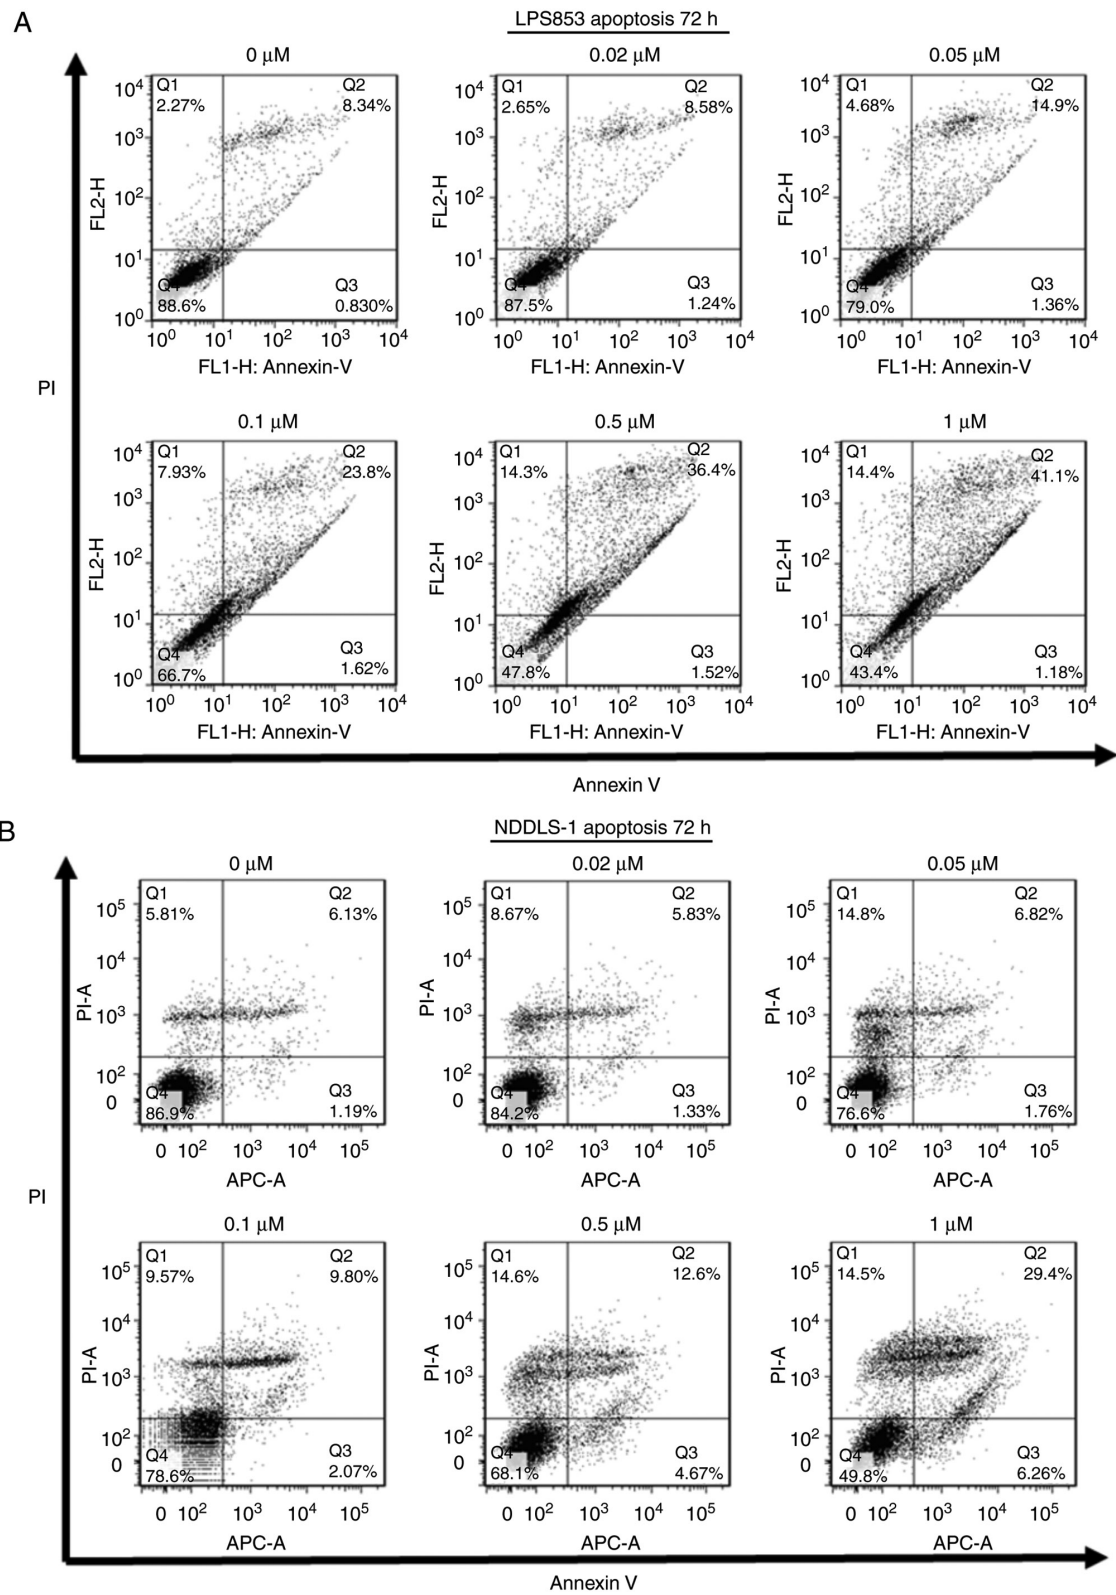

Supplement: Supplementary file 1 [file downloadSupplementary]
